# Supplementary material for: Effects of Si-Miao-Yong-An decoction on myocardial I/R rats by regulating gut microbiota to inhibit LPS-induced TLR4/NF-κB signaling pathway
Source: Springer Nature journal article supplement (doi:10.1186/s12906-023-04013-9), 2023-06-02

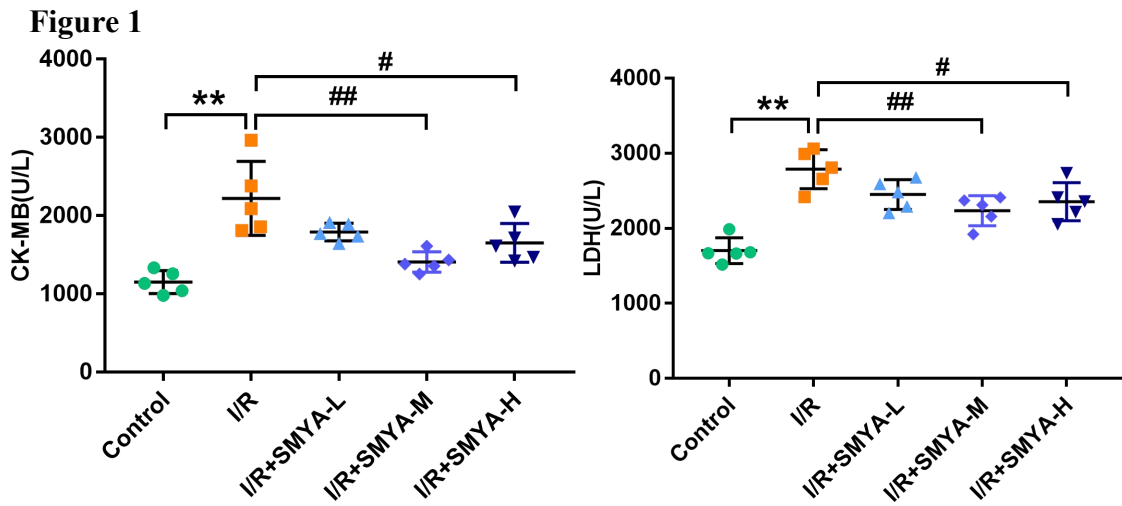

Figure 1 Markers of myocardial damage: CK-MB and LDH. \*\* $P < 0.01$  vs. Control group, # $P < 0.05$  and ### $P < 0.01$  vs. I/R group.

## Western blot uncut blots

### 1. TLR4

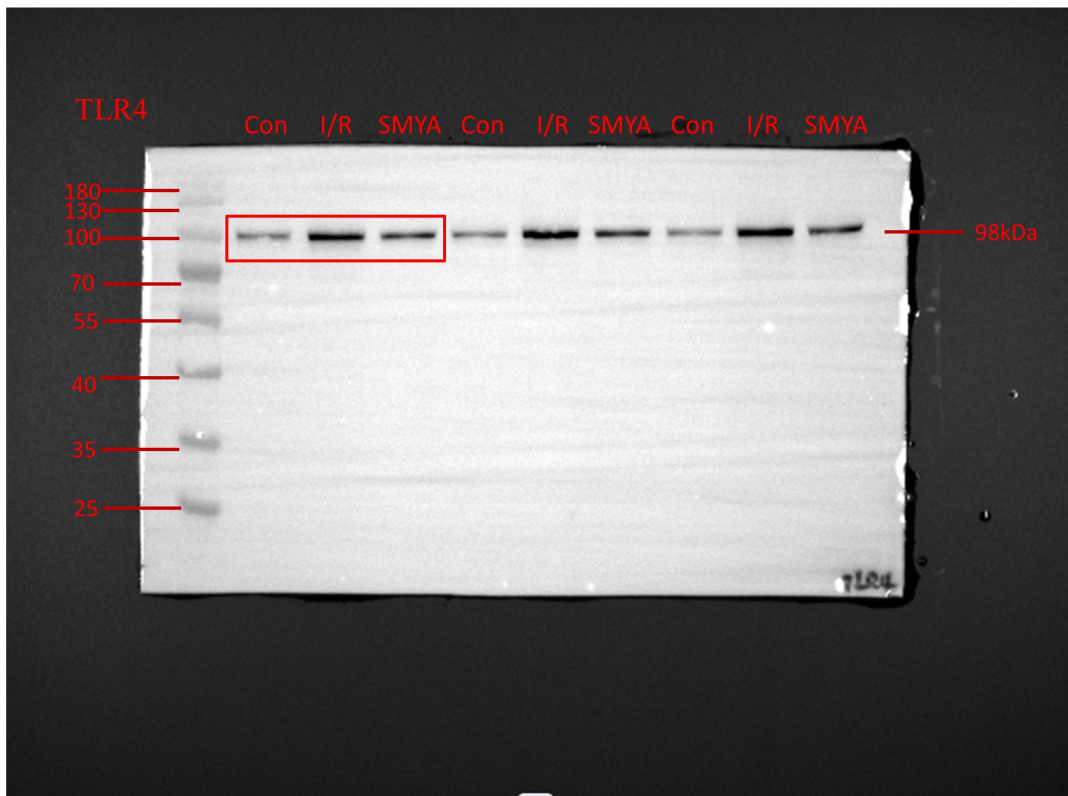

## 2. P-P65

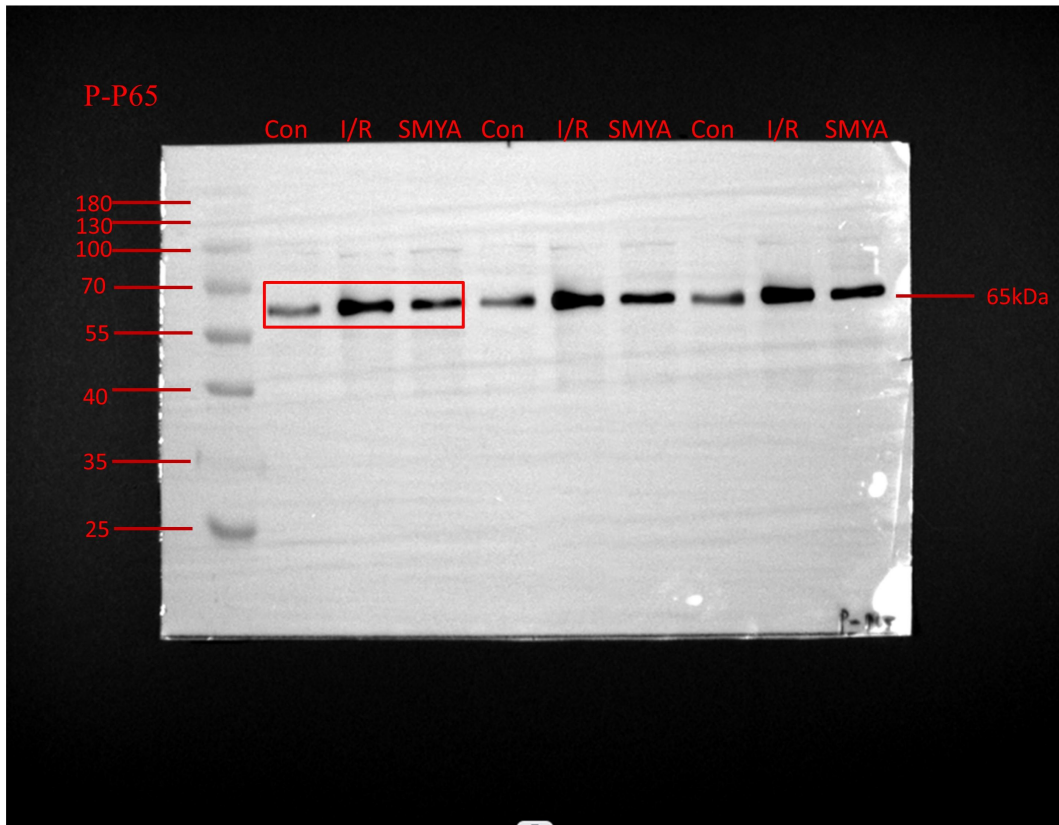

## 3. $\beta$ -actin 1

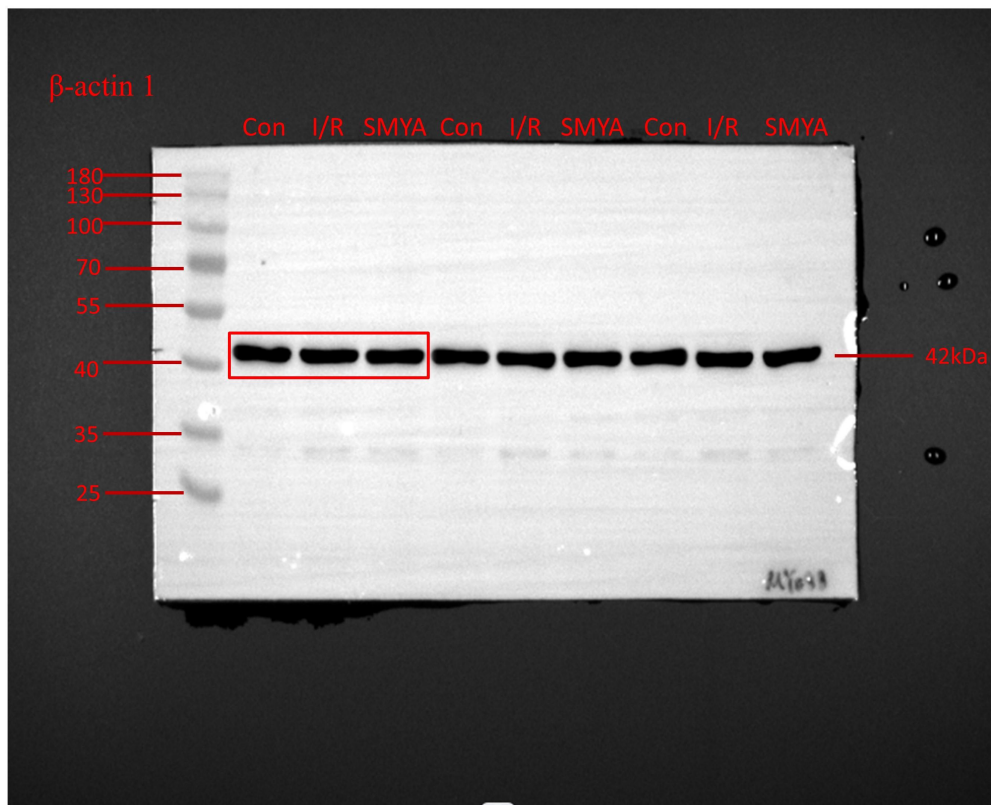

#### 4. MyD88

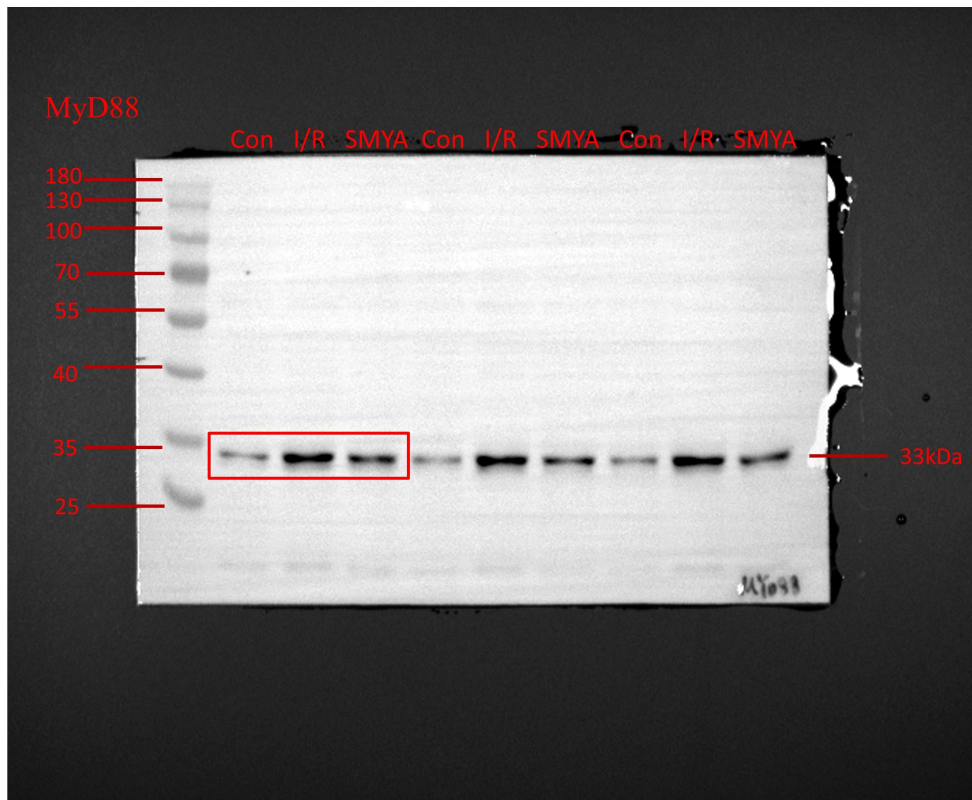

#### 5. P65 Cytoplasm

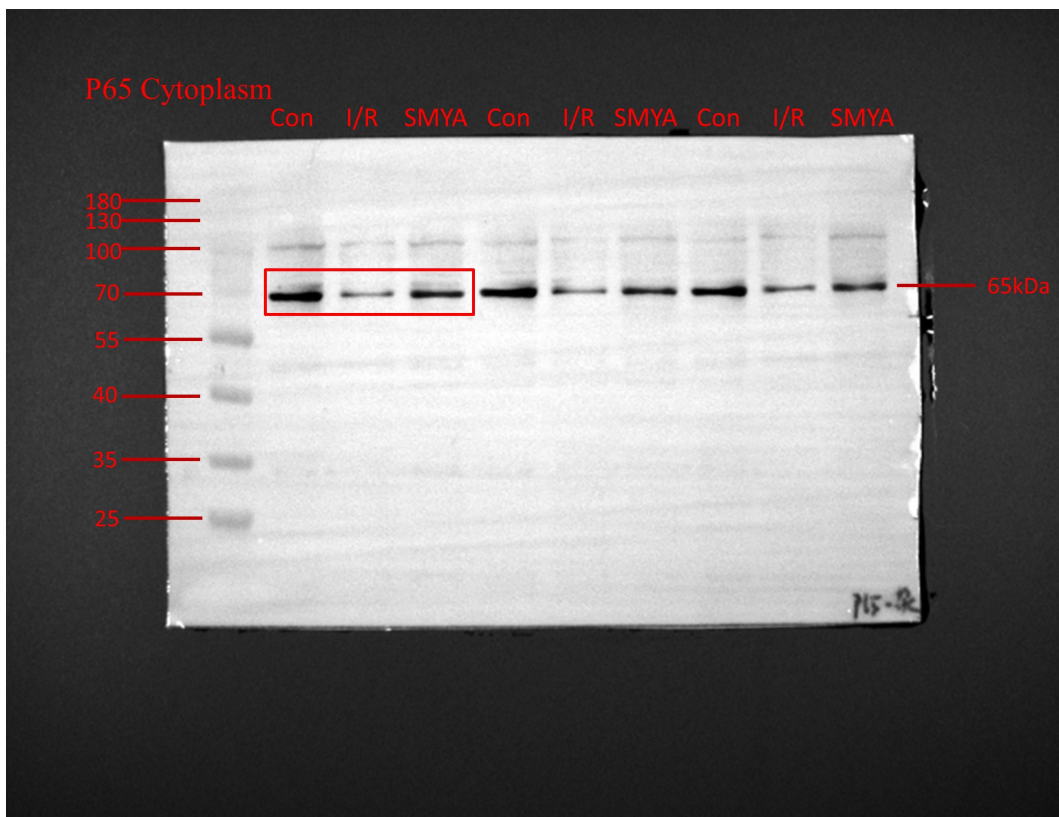



## 6. $\beta$ -actin 2

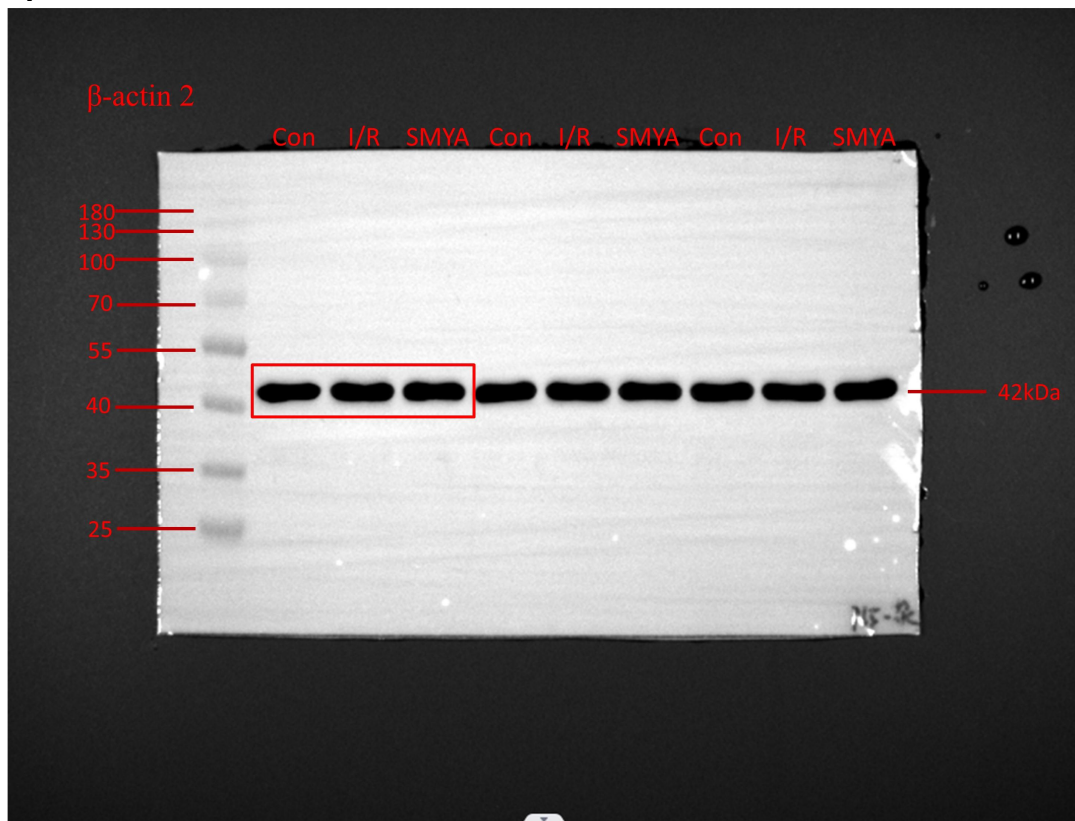

## 7. P65 Nucleus

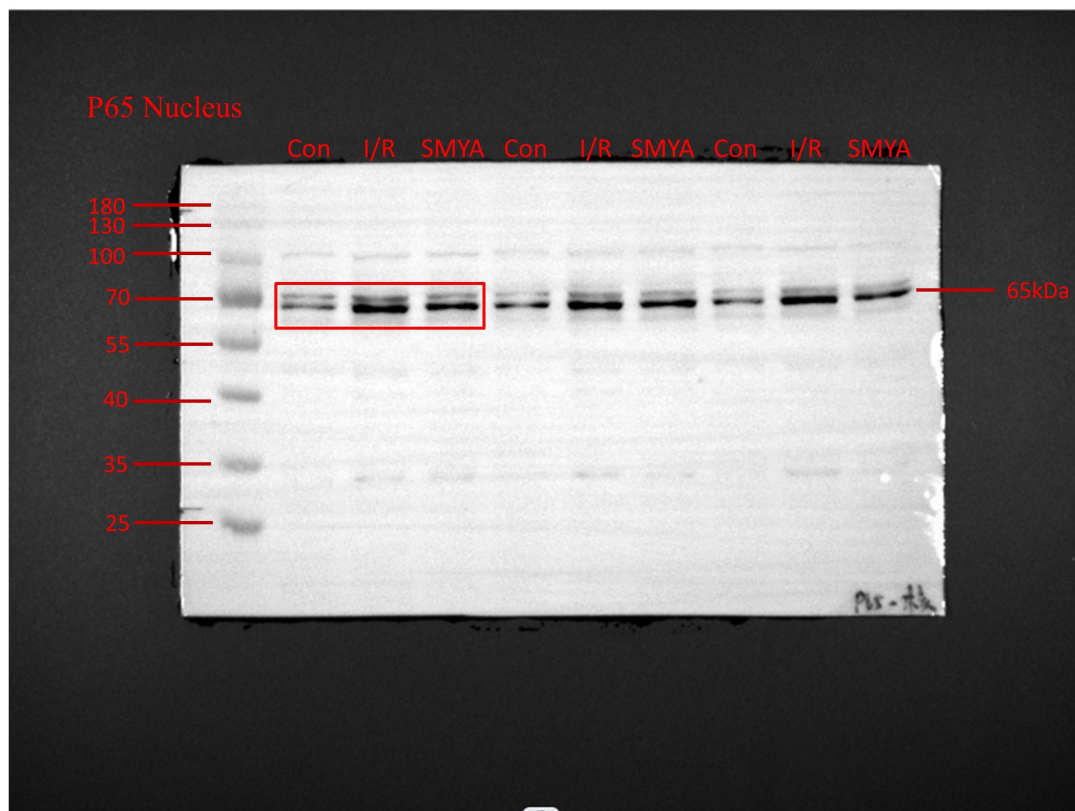

## 8. LaminB

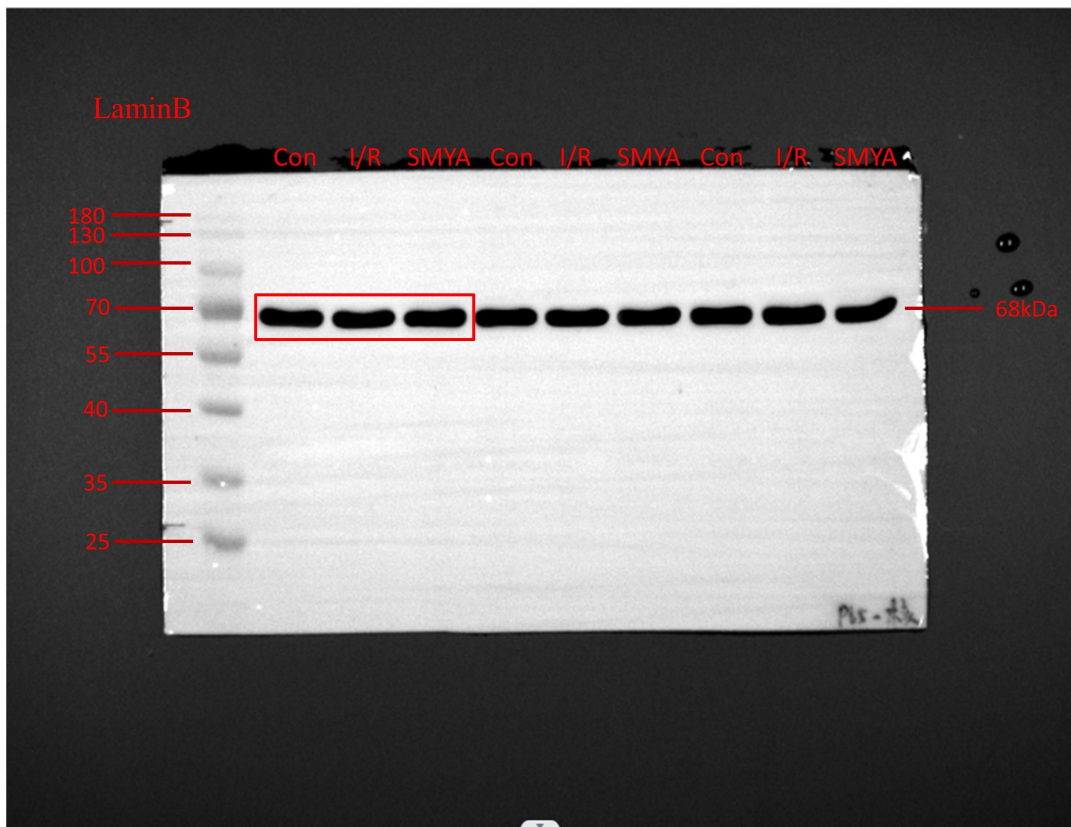

## 9. ZO-1

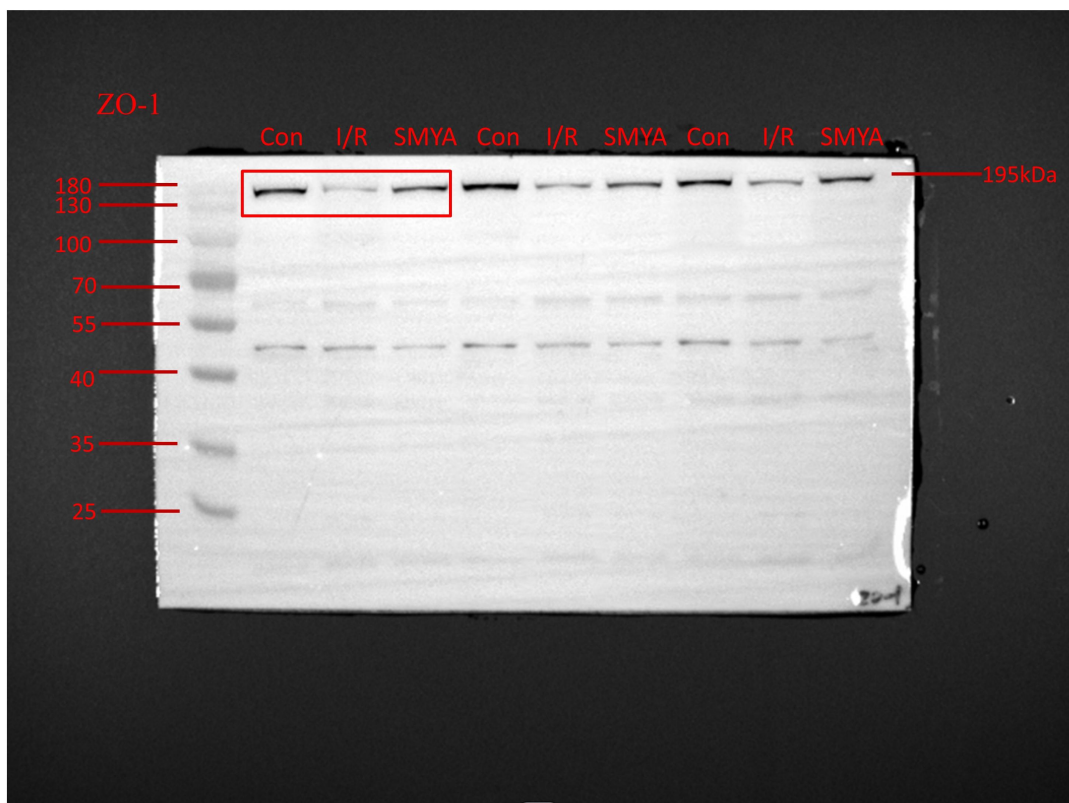

## 10. Occludin

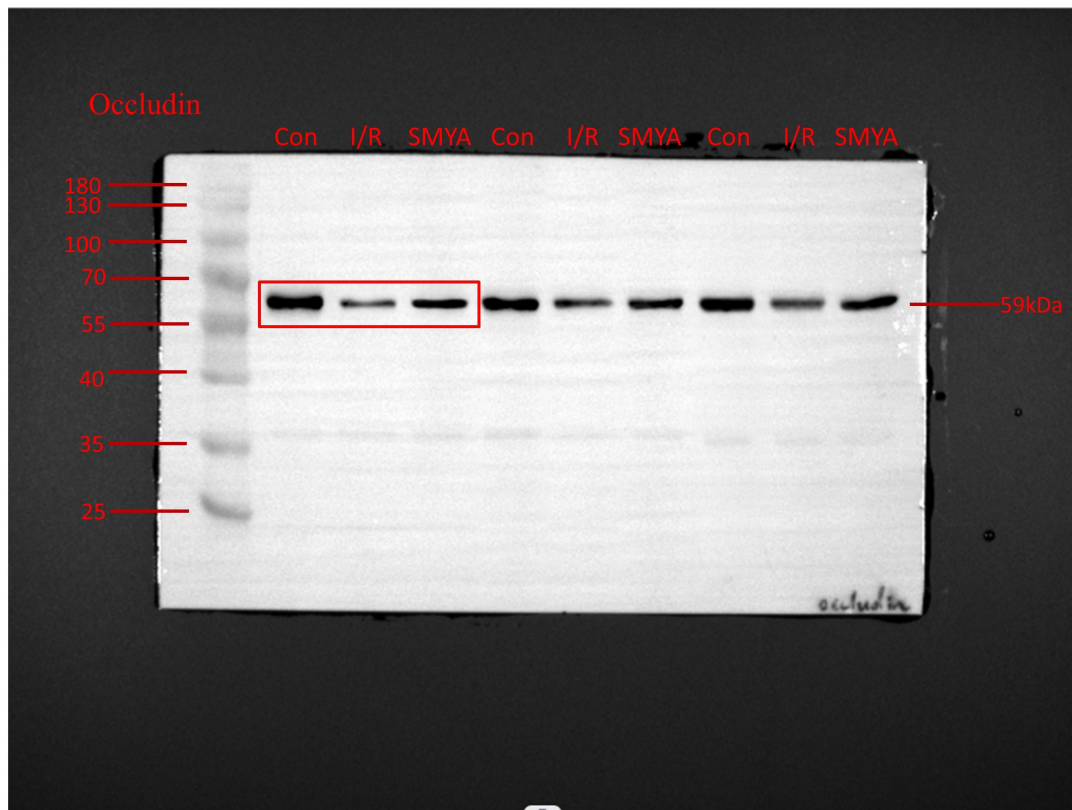

## 11. $\beta$ -actin 3

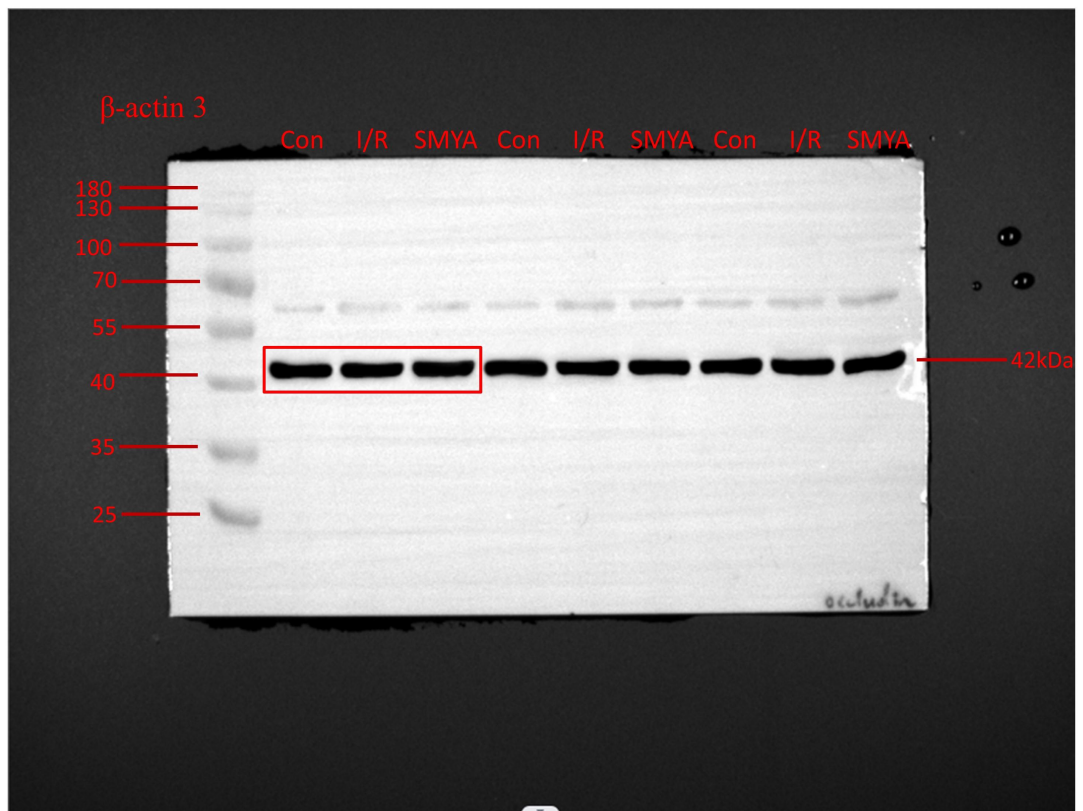

Supplement: MOESM1 [file 25440738]
